# Supplementary material
Source: PubMed Central journal article supplement (PMC167038)
Supplement: plntphys_132_2_999__1.pdf [file plntphys_132_2_999__1.pdf]

## Supplementary Table

|                                                   | Accession | Ch1    | SD1  | Ch2   | SD2  | NNDiff | Ratio | Ttest | Previously reported |
|---------------------------------------------------|-----------|--------|------|-------|------|--------|-------|-------|---------------------|
| <b>Putative disease resistance genes</b>          |           |        |      |       |      |        |       |       |                     |
| Putative disease resistance protein               | T04362    | 0.071  | 0.00 | 0.261 | 0.10 | -1.14  | 3.68  | 0.06  | Loc SA Eth          |
| Similar to flax rust resistance protein           | R29891    | 0.448  | 0.20 | 1.010 | 0.54 | -0.77  | 2.26  | 0.08  | Loc                 |
| Disease resistance protein                        | T43968    | 3.694  | 0.90 | 1.532 | 0.79 | 0.83   | -2.41 | 0.06  | Loc SA MJ           |
| <b>Putative regulatory genes</b>                  |           |        |      |       |      |        |       |       |                     |
| MYB-related protein                               | Z46510    | 0.186  | 0.06 | 0.562 | 0.35 | -1.01  | 3.03  | 0.07  | Loc SA MJ           |
| Putative SNF2 subfamily transcriptional activator | W43888    | 0.202  | 0.04 | 0.567 | 0.25 | -0.95  | 2.80  | 0.09  | Loc                 |
| Salt-tolerance zinc finger protein (At1g27730)    | R29923    | 0.438  | 0.29 | 1.472 | 1.04 | -1.08  | 3.36  | 0.09  | MJ Eth              |
| Putative CCCH zinc finger protein (At2g40140)     | Z34649    | 0.285  | 0.19 | 0.952 | 0.69 | -1.08  | 3.34  | 0.09  | SA MJ               |
| H-protein promoter binding factor 2a              | F14111    | 0.069  | 0.04 | 0.294 | 0.17 | -1.24  | 4.26  | 0.11  | SA                  |
| MEKK1 MAP kinase kinase kinase                    | T04696    | 0.093  | 0.01 | 0.261 | 0.14 | -0.95  | 2.79  | 0.12  | SA MJ               |
| Calmodulin-domain protein kinase                  | R90026    | 0.066  | 0.03 | 0.155 | 0.08 | -0.81  | 2.36  | 0.13  | Eth                 |
| Putative protein phosphatase regulatory subunit   | Z47392    | 0.370  | 0.17 | 0.861 | 0.66 | -0.80  | 2.32  | 0.14  | Loc                 |
| Putative leucine rich repeat protein              | Z34571    | 0.063  | 0.05 | 0.141 | 0.06 | -0.77  | 2.25  | 0.15  | SA MJ               |
| Putative response regulator                       | Z34204    | 0.564  | 0.32 | 1.127 | 0.75 | -0.67  | 2.00  | 0.15  | Loc SA              |
| Transcription initiation factor II B              | Z37605    | 0.130  | 0.08 | 0.298 | 0.26 | -0.79  | 2.29  | 0.17  | Loc SA MJ Eth       |
| Zinc finger protein                               | T41722    | 0.118  | 0.09 | 0.403 | 0.36 | -1.10  | 3.43  | 0.20  | Loc MJ              |
| <b>Cell wall modification</b>                     |           |        |      |       |      |        |       |       |                     |
| Putative endo 1,4 beta glucanase                  | T43127    | 0.070  | 0.01 | 0.189 | 0.10 | -0.92  | 2.70  | 0.06  |                     |
| Cellulose synthase catalytic subunit              | T45414    | 0.096  | 0.03 | 0.262 | 0.08 | -0.93  | 2.74  | 0.06  |                     |
| Xyloglucan endo 1,4 beta D glucanase              | Z17989    | 0.073  | 0.00 | 0.146 | 0.04 | -0.67  | 2.00  | 0.06  |                     |
| Cellulose synthase catalytic subunit              | N96707    | 0.444  | 0.19 | 1.181 | 0.72 | -0.91  | 2.66  | 0.08  | Loc                 |
| Putative cellulase                                | T76139    | 0.060  | 0.02 | 0.186 | 0.10 | -1.02  | 3.07  | 0.11  | SA MJ Eth           |
| Cellulase homolog (16 pep precursor)              | N96850    | 0.991  | 0.52 | 1.996 | 1.35 | -0.67  | 2.01  | 0.15  | Loc SA              |
| Extensin (from tomato, <i>L. esculentum</i> )     | Z18787    | 0.036  | 0.03 | 0.101 | 0.06 | -0.94  | 2.78  | 0.15  |                     |
| <b>Secondary metabolism</b>                       |           |        |      |       |      |        |       |       |                     |
| Peroxidase ATP1a                                  | T22814    | 2.056  | 0.52 | 5.376 | 1.69 | -0.89  | 2.61  | 0.06  |                     |
| Peroxidase                                        | T76760    | 0.091  | 0.02 | 0.239 | 0.08 | -0.89  | 2.62  | 0.06  | SA                  |
| Putative cytochrome P450 CYP76C2                  | N65907    | 0.655  | 0.49 | 2.585 | 1.66 | -1.19  | 3.95  | 0.06  | Loc MJ Eth          |
| Tryptophan decarboxylase-like protein             | H76002    | 0.045  | 0.02 | 0.090 | 0.02 | -0.65  | 2.00  | 0.07  |                     |
| Brassinosteroid insensitive 1                     | F13577    | 0.036  | 0.00 | 0.134 | 0.06 | -1.16  | 3.77  | 0.08  |                     |
| Putative cytochrome P450                          | T04016    | 0.062  | 0.04 | 0.162 | 0.06 | -0.89  | 2.60  | 0.10  | MJ Eth              |
| Peroxidase 8                                      | T88162    | 0.072  | 0.08 | 0.191 | 0.11 | -0.90  | 2.65  | 0.18  |                     |
| Putative acetylglucosamine transferase            | T88627    | 15.769 | 7.66 | 5.864 | 4.20 | 0.92   | -2.69 | 0.12  | SA MJ               |
| <b>Stress-associated</b>                          |           |        |      |       |      |        |       |       |                     |
| DNA-damage-repair/toleration (DRT100) precursor   | T75662    | 0.024  | 0.00 | 0.132 | 0.06 | -1.38  | 5.49  | 0.06  |                     |
| Blue copper binding protein                       | T44253    | 0.057  | 0.05 | 0.349 | 0.19 | -1.44  | 6.11  | 0.09  | MJ                  |
| Polyubiquitin                                     | T42370    | 0.853  | 0.52 | 1.943 | 1.23 | -0.78  | 2.28  | 0.12  | Loc                 |
| Monodehydroascorbate reductase-like protein       | H36099    | 0.022  | 0.00 | 0.114 | 0.08 | -1.35  | 5.15  | 0.12  |                     |
| Cysteine protease (AALP)                          | T04773    | 0.390  | 0.19 | 0.842 | 0.57 | -0.73  | 2.16  | 0.13  | Loc SA              |
| Dehydrin ERD14                                    | AA042534  | 1.107  | 0.74 | 2.641 | 2.05 | -0.82  | 2.38  | 0.15  | Loc MJ              |
| Glutathione S-transferase                         | R30007    | 5.400  | 2.46 | 1.613 | 0.13 | 1.08   | -3.35 | 0.08  | SA                  |
| <b>Cell maintenance/development/other</b>         |           |        |      |       |      |        |       |       |                     |
| Gamma-glutamyl cysteine synthetase                | R90472    | 0.498  | 0.08 | 1.086 | 0.51 | -0.74  | 2.18  | 0.06  | Loc MJ Eth          |
| Hexokinase 2                                      | E1C7T7    | 0.077  | 0.07 | 0.209 | 0.02 | -0.92  | 2.71  | 0.06  |                     |
| Unknown protein                                   | T44615    | 0.062  | 0.04 | 0.153 | 0.04 | -0.85  | 2.47  | 0.07  | SA MJ               |
| nuclear ribonucleoprotein                         | T88454    | 0.114  | 0.10 | 0.286 | 0.13 | -0.86  | 2.50  | 0.07  |                     |
| Protodermal factor PDF1                           | R29920    | 0.487  | 0.18 | 1.059 | 0.52 | -0.74  | 2.18  | 0.07  | SA                  |
| Unknown protein                                   | H36431    | 1.941  | 0.72 | 4.597 | 2.52 | -0.81  | 2.37  | 0.08  |                     |
| Unknown protein                                   | T76703    | 0.721  | 0.28 | 1.499 | 0.71 | -0.70  | 2.08  | 0.08  | Loc SA MJ Eth       |
| Putative aldehyde dehydrogenase homolog           | T20704    | 0.189  | 0.09 | 0.411 | 0.11 | -0.74  | 2.17  | 0.08  | Loc MJ              |
| Adenylate translocator                            | T21051    | 0.753  | 0.34 | 1.844 | 1.05 | -0.84  | 2.45  | 0.08  | Loc                 |
| Putative isocitrate lyase                         | N96226    | 0.029  | 0.04 | 0.110 | 0.04 | -1.17  | 3.84  | 0.09  | MJ                  |
| Myrosinase                                        | N38380    | 4.541  | 1.07 | 9.086 | 4.68 | -0.67  | 2.00  | 0.09  |                     |
| Unknown protein                                   | N96773    | 0.180  | 0.04 | 0.452 | 0.30 | -0.86  | 2.51  | 0.10  | SA                  |
| Unknown protein                                   | H76266    | 0.268  | 0.16 | 0.535 | 0.31 | -0.66  | 2.00  | 0.13  | Loc MJ Eth          |
| ATPase beta subunit                               | R30628    | 0.610  | 0.33 | 1.498 | 1.13 | -0.84  | 2.46  | 0.13  | Loc                 |
| Plasma membrane ATPase 2 (proton pump)            | AA042396  | 0.064  | 0.02 | 0.181 | 0.11 | -0.96  | 2.84  | 0.13  | SA                  |
| Glucose-6-phosphate 1-dehydrogenase               | H37123    | 0.197  | 0.15 | 0.398 | 0.24 | -0.68  | 2.03  | 0.14  | Loc                 |
| Chlorophyll a/b-binding protein                   | N65380    | 0.447  | 0.01 | 1.006 | 0.80 | -0.77  | 2.25  | 0.15  | SA                  |
| Unknown protein (At2g23120)                       | T21007    | 0.303  | 0.11 | 0.774 | 0.47 | -0.87  | 2.55  | 0.15  |                     |
| Unknown protein                                   | T75756    | 0.035  | 0.00 | 0.091 | 0.06 | -0.89  | 2.61  | 0.15  |                     |
| Putative glucosyltransferase                      | B28707    | 0.063  | 0.02 | 0.149 | 0.11 | -0.81  | 2.37  | 0.19  | SA MJ               |
| Senescence-associated protein sen1 (AT4g35770)    | T04509    | 0.056  | 0.01 | 0.108 | 0.08 | -0.63  | 2.98  | 0.22  | SA MJ               |
| GAST1-like protein                                | T76916    | 6.256  | 2.97 | 2.825 | 0.67 | 0.76   | -2.21 | 0.06  | Loc MJ Eth          |
| Plasma membrane intrinsic protein SF3             | T42925    | 1.861  | 0.61 | 0.651 | 0.36 | 0.96   | -2.86 | 0.07  | Loc SA MJ           |
| Glycolate oxidase-like protein                    | T88637    | 4.260  | 1.56 | 1.438 | 0.91 | 0.99   | -2.96 | 0.08  | Loc SA              |
| ChloroplastpsbA                                   | Cl0018    | 0.977  | 0.76 | 0.363 | 0.19 | 0.92   | -2.69 | 0.12  | Loc                 |
